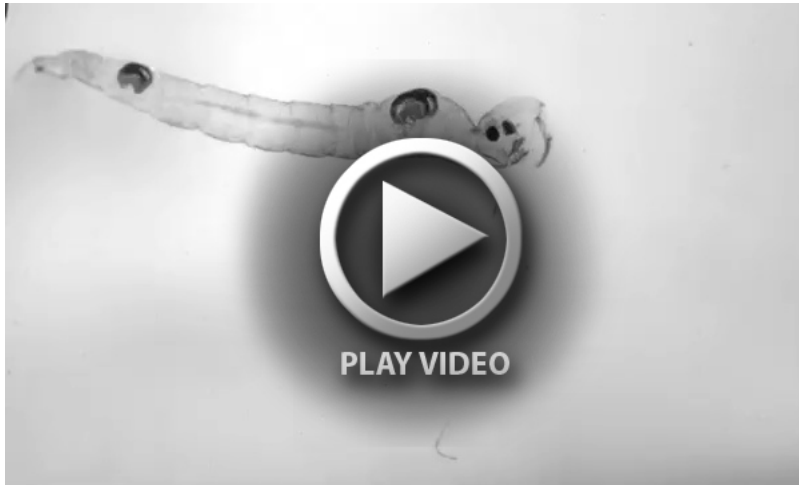

**Movie 1.** Larva of *Chaoborus crystallinus* performing a single cycle of rotation through almost 360 degrees. Images were captured at 1000 frames  $s^{-1}$  and are replayed at 30 frames  $s^{-1}$ . See also Text Fig. 2.

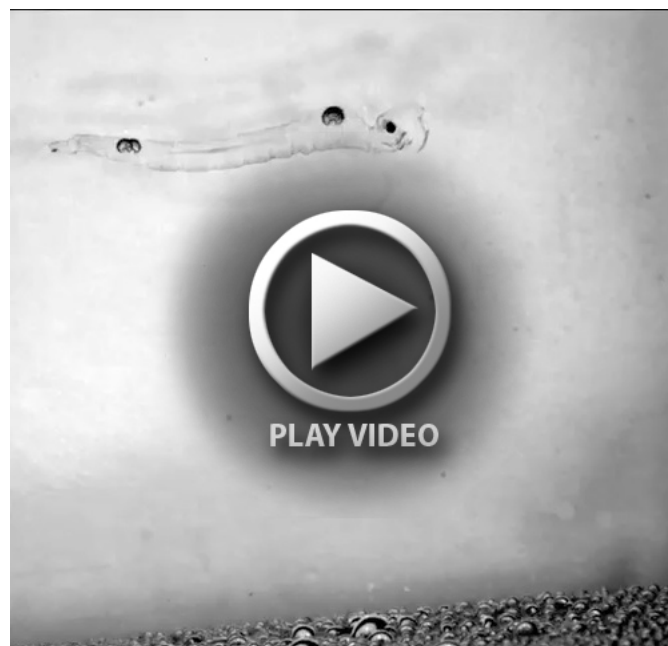

**Movie 2.** Larva of *Chaoborus crystallinus* performing three cycles of rotations. Images were captured at 1000 frames  $s^{-1}$  and are replayed at 30 frames  $s^{-1}$ . See also Text Fig. 4.

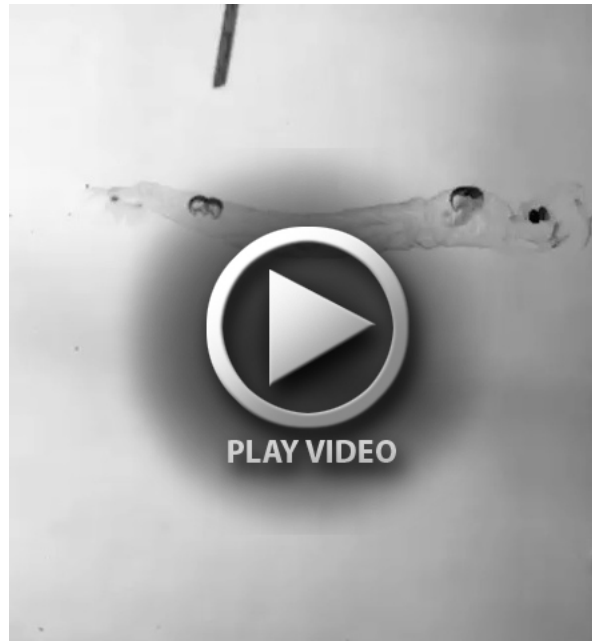

**Movie 3. Single cycle of movement by a larva of *Chaoborus crystallinus* with its fan clipped to reduce its area by 80%. Images were captured at 1000 frames  $s^{-1}$  and are replayed at 30 frames  $s^{-1}$ . See also Text Fig. 8.**

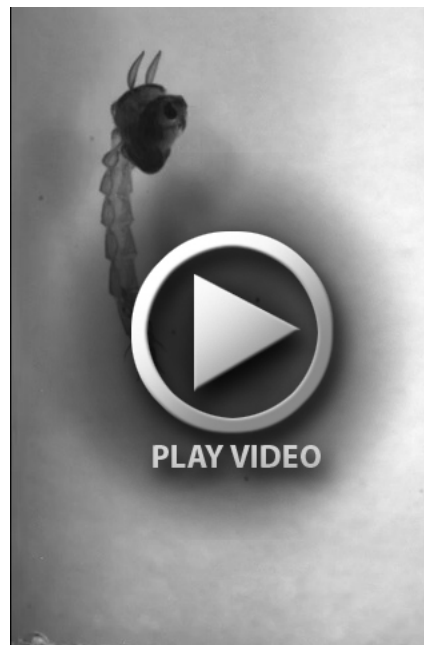

**Movie 4. Pupa of *Chaoborus crystallinus* performing a single cycle of rotation. Images were captured at 1000 frames  $s^{-1}$  and are replayed at 30 frames  $s^{-1}$ . See also Text Fig. 9A.**

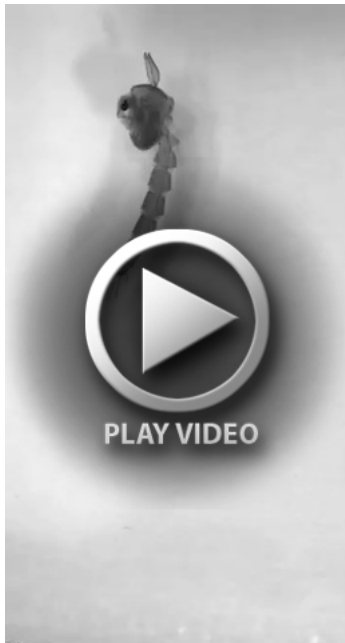

**Movie 5. Pupa of *Chaoborus crystallinus* performing a sequence of rotations.** Images were captured at 1000 frames  $s^{-1}$  and are replayed at 30 frames  $s^{-1}$ . See also Text Fig. 9B-D.
